# Supplementary material
Source: Elsevier journal article supplement (https://univ-rennes.hal.science/hal-01381134/file/mmc2.pdf)
Supplement: mmc2 [file mmc2.pdf]

## Supplementary information to

### Non-covalently generated 3D supramolecular crystal structure in a new family of hybrid nitrates **templated by piperazine**: thermal behavior and *in vitro* antimicrobial potential

Dhouha Ben Hassan<sup>a</sup>, Walid Rekik<sup>a</sup>, Alberto Otero-de-la Roza<sup>b</sup>, Fedia Ben

Mefteh<sup>c</sup>, Thierry Roisnel<sup>d</sup>, Thierry Bataille<sup>e</sup> and Houcine Naïli<sup>a,\*</sup>

<sup>a</sup> : *Laboratoire Physicochimie de l'État Solide, Département de Chimie, Faculté des Sciences de Sfax, Université de Sfax, BP 1171, 3000, Tunisia.*

<sup>b</sup> : *National Institute for Nanotechnology, National Research Council of Canada, 11421 Saskatchewan Drive, Edmonton, Alberta Canada T6G 2M9.*

<sup>c</sup> : *Laboratory of plant biotechnology. Faculty of sciences, University of Sfax, B.P 1171, 3000, Tunisia.*

<sup>d</sup> : *Institut des Sciences Chimiques de Rennes (ISCR), UMR 6226 CNRS-Université de Rennes 1, Campus de Beaulieu, 263 avenue du General Leclerc, Bat 10A, 35042 Rennes Cedex, France.*

<sup>e</sup> : *Ecole Nationale Supérieure de Chimie de Rennes, 11 Allée de Beaulieu F-35708 RENNES cedex 7, France.*

Corresponding author:

*E-mail address: [houcine\\_naïli@yahoo.com](mailto:houcine_naïli@yahoo.com)*

Tel: +216 98 66 00 26; fax: +216 74 274 437

Figure SI2: Asymmetric unit of  $(C_4H_{12}N_2)_3[Co(H_2O)_6](NO_3)_8$  (**3**) extended by symmetry. The thermal ellipsoids are plotted at the 50% probability level. H bonds are represented by dashed lines.
